# Supplementary material for: Freshwater Fishes of Central America: Distribution, Assessment, and Major Threats
Source: MDPI journal article supplement (doi:10.3390/d14100793), 2022-09-24
Supplement: s1 [file s1]

# Supplementary Materials

Table S1. Summary of Central American freshwater fishes conservation status under IUCN Red List Categories: Critically Endangered (CR), Endangered (EN), and Vulnerable (VU). Tolerance to salinity is included as primary (Pri), secondary (Sec), and peripheral (Per). Countries of distribution and endemism are shown as Guatemala (G), Belize (B), El Salvador (EL), Honduras (H), Costa Rica (CoR), Nicaragua (N), and Panama (P).

| Family       | Species                          | Tolerance to salinity | List of countries present | Country of endemism | Red-list category | Population trend | Year of assessment |
|--------------|----------------------------------|-----------------------|---------------------------|---------------------|-------------------|------------------|--------------------|
| Sphyrnidae   | <i>Sphyrna lewini</i>            | Per                   | G, ES                     |                     | CR                | Decreasing       | 2018               |
| Pristidae    | <i>Pristis pectinata</i>         | Per                   | G, H, N, CoR              |                     | CR                | Decreasing       | 2012               |
|              | <i>Pristis pristis</i>           | Per                   | G, N, CoR,P               |                     | CR                | Decreasing       | 2013               |
| Megalopidae  | <i>Megalops atlanticus</i>       | Per                   | B, G, ES, H, N, CoR,P     |                     | VU                | Decreasing       | 2018               |
| Anguillidae  | <i>Anguilla rostrata</i>         | Per                   | B, G, H, N, CoR,P         |                     | EN                | Decreasing       | 2013               |
| Characidae   | <i>Astyanax anai</i>             | Pri                   | CoR,P                     |                     | EN                | Decreasing       | 2019               |
|              | <i>Astyanax kompi</i>            | Pri                   | P                         | P                   | CR                | Unknown          | 2020               |
|              | <i>Astyanax petenensis</i>       | Pri                   | G                         |                     | VU                | Unknown          | 2018               |
|              | <i>Carlana eigenmanni</i>        | Pri                   | N, CoR                    |                     | VU                | Unknown          | 2019               |
|              | <i>Eretmobrycon bayano</i>       | Pri                   | P                         | P                   | VU                | Unknown          | 2019               |
|              | <i>Eretmobrycon gonzalezi</i>    | Pri                   | CoR,P                     |                     | EN                | Unknown          | 2019               |
|              | <i>Eretmobrycon terrabensis</i>  | Pri                   | CoR                       | CoR                 | VU                | Unknown          | 2019               |
|              | <i>Hyphessobrycon bussingi</i>   | Pri                   | CoR,P                     |                     | EN                | Decreasing       | 2019               |
|              | <i>Hyphessobrycon panamensis</i> | Pri                   | P                         | P                   | VU                | Unknown          | 2019               |
|              | <i>Hyphessobrycon savagei</i>    | Pri                   | CoR                       | CoR                 | VU                | Unknown          | 2019               |
|              | <i>Odontostilbe mitoptera</i>    | Pri                   | P                         | P                   | VU                | Unknown          | 2020               |
|              | <i>Pseudocheiroduon terrabae</i> | Pri                   | CoR                       | CoR                 | VU                | Unknown          | 2019               |
|              | <i>Pterobrycon myrnae</i>        | Pri                   | CoR                       | CoR                 | EN                | Decreasing       | 2019               |
|              | <i>Roebooides ilseae</i>         | Pri                   | CoR                       | CoR                 | VU                | Stable           | 2019               |
| Bryconidae   | <i>Brycon obscurus</i>           | Pri                   | P                         | P                   | VU                | Unknown          | 2019               |
| Lebiasinidae | <i>Lebiasina boruca</i>          | Pri                   | CoR                       | CoR                 | VU                | Unknown          | 2019               |
| Loricariidae | <i>Rineloricaria altipinnis</i>  | Pri                   | P                         | P                   | VU                | Unknown          | 2019               |

|                |                                      |     |          |     |    |            |      |
|----------------|--------------------------------------|-----|----------|-----|----|------------|------|
| Heptapteridae  | <i>Imparfinis lineatus</i>           | Pri | CoR      | CoR | EN | Unknown    | 2019 |
| Ariidae        | <i>Notarius cookei</i>               | Per | CoR,P    |     | VU | Decreasing | 2007 |
| Gymnotidae     | <i>Gymnotus panamensis</i>           | Pri | P        | P   | CR | Unknown    | 2019 |
| Lacantunidae   | <i>Lacantunia enigmatica</i>         | Pri | G        |     | VU | Unknown    | 2018 |
| Atherinopsidae | <i>Atherinella guija</i>             | Per | G, ES, H |     | VU | Unknown    | 2019 |
|                | <i>Atherinella jilaoensis</i>        | Per | N        | N   | CR | Decreasing | 2007 |
|                | <i>Atherinella sardina</i>           | Per | N, CoR   |     | VU | Unknown    | 2019 |
| Rivulidae      | <i>Cynodonichthys birkhahni</i>      | Sec | P        | P   | EN | Unknown    | 2019 |
|                | <i>Cynodonichthys fuscolineatus</i>  | Sec | CoR      | CoR | EN | Unknown    | 2019 |
|                | <i>Cynodonichthys glaucus</i>        | Sec | CoR      | CoR | EN | Unknown    | 2019 |
|                | <i>Cynodonichthys kuelpmanni</i>     | Sec | P        | P   | CR | Unknown    | 2019 |
|                | <i>Cynodonichthys montium</i>        | Sec | P        | P   | EN | Unknown    | 2019 |
|                | <i>Cynodonichthys rubripunctatus</i> | Sec | CoR,P    |     | EN | Decreasing | 2019 |
|                | <i>Cynodonichthys siegfriedi</i>     | Sec | CoR      | CoR | EN | Unknown    | 2019 |
|                | <i>Cynodonichthys uroflammeus</i>    | Sec | CoR,P    |     | EN | Unknown    | 2019 |
|                | <i>Cynodonichthys wassmanni</i>      | Sec | P        | P   | EN | Unknown    | 2019 |
|                | <i>Cynodonichthys weberi</i>         | Sec | P        | P   | VU | Unknown    | 2019 |
| Profundulidae  | <i>Profundulus guatemalensis</i>     | Sec | G, ES, H |     | VU | Unknown    | 2019 |
|                | <i>Profundulus kreiseri</i>          | Sec | G, ES, H |     | VU | Unknown    | 2019 |
|                | <i>Tlalo portillorum</i>             | Sec | H        | H   | EN | Unknown    | 2020 |
| Poeciliidae    | <i>Brachyrhaphis rhabdophora</i>     | Sec | CoR      | CoR | VU | Unknown    | 2019 |
|                | <i>Hiatirhaphis parismina</i>        | Sec | N, CoR   |     | VU | Unknown    | 2019 |
|                | <i>Phallichthys quadripunctatus</i>  | Sec | CoR, P   |     | EN | Decreasing | 2019 |
|                | <i>Phallichthys tico</i>             | Sec | N, CoR   |     | VU | Unknown    | 2019 |
|                | <i>Poecilia rositae</i>              | Sec | G        | G   | EN | Unknown    | 2020 |
|                | <i>Poecilia teresae</i>              | Sec | B        | B   | EN | Unknown    | 2019 |
|                | <i>Poeciliopsis paucimaculata</i>    | Sec | CoR      | CoR | EN | Unknown    | 2020 |
|                | <i>Poeciliopsis retropinna</i>       | Sec | CoR,P    |     | VU | Unknown    | 2019 |
|                | <i>Poeciliopsis santaelena</i>       | Sec | CoR      | CoR | VU | Unknown    | 2020 |

|            |                                     |     |        |     |    |            |      |
|------------|-------------------------------------|-----|--------|-----|----|------------|------|
|            | <i>Priapichthys puetzi</i>          | Sec | P      | P   | CR | Unknown    | 2019 |
|            | <i>Pseudoxiphophorus attenuatus</i> | Sec | G      | G   | CR | Unknown    | 2019 |
|            | <i>Pseudoxiphophorus cataractae</i> | Sec | G      | G   | VU | Unknown    | 2019 |
|            | <i>Pseudoxiphophorus diremptus</i>  | Sec | G      | G   | VU | Unknown    | 2019 |
|            | <i>Scolichthys iota</i>             | Sec | G      | G   | VU | Unknown    | 2019 |
|            | <i>Xenophallus umbratilis</i>       | Sec | N, CoR |     | VU | Unknown    | 2019 |
|            | <i>Xiphophorus signum</i>           | Sec | G      | G   | VU | Unknown    | 2019 |
| Serranidae | <i>Epinephelus itajara</i>          | Per | B      |     | VU | Decreasing | 2016 |
| Lutjanidae | <i>Lutjanus cyanopterus</i>         | Per | N      |     | VU | Decreasing | 2015 |
| Cichlidae  | <i>Amatitlania kanna</i>            | Sec | CoR,P  |     | EN | Decreasing | 2019 |
|            | <i>Amatitlania myrnae</i>           | Sec | CoR,P  |     | EN | Decreasing | 2019 |
|            | <i>Amatitlania sajica</i>           | Sec | CoR    | CoR | VU | Unknown    | 2019 |
|            | <i>Amphilophus amarillo</i>         | Sec | N      | N   | VU | Stable     | 2019 |
|            | <i>Amphilophus astorquii</i>        | Sec | N      | N   | CR | Decreasing | 2019 |
|            | <i>Amphilophus chancho</i>          | Sec | N      | N   | CR | Decreasing | 2019 |
|            | <i>Amphilophus flaveolus</i>        | Sec | N      | N   | CR | Decreasing | 2019 |
|            | <i>Amphilophus globosus</i>         | Sec | N      | N   | CR | Decreasing | 2019 |
|            | <i>Amphilophus lyonsi</i>           | Sec | CoR,P  |     | EN | Unknown    | 2019 |
|            | <i>Amphilophus margaritifer</i>     | Sec | G      | G   | EN | Decreasing | 2007 |
|            | <i>Amphilophus sagittae</i>         | Sec | N      | N   | VU | Stable     | 2019 |
|            | <i>Amphilophus superciliosus</i>    | Sec | N      | N   | CR | Decreasing | 2019 |
|            | <i>Amphilophus tolteca</i>          | Sec | N      | N   | VU | Stable     | 2020 |
|            | <i>Amphilophus viridis</i>          | Sec | N      | N   | VU | Stable     | 2020 |
|            | <i>Amphilophus xiloaensis</i>       | Sec | N      | N   | VU | Stable     | 2019 |
|            | <i>Amphilophus zaliosus</i>         | Sec | N      | N   | CR | Decreasing | 2019 |
|            | <i>Chiapaheros grammodes</i>        | Sec | G      |     | VU | Unknown    | 2019 |
|            | <i>Chortiheros wesseli</i>          | Sec | H      | H   | VU | Unknown    | 2020 |
|            | <i>Cribroheros altifrons</i>        | Sec | CoR,P  |     | VU | Unknown    | 2019 |
|            | <i>Cribroheros bussingi</i>         | Sec | CoR,P  |     | EN | Unknown    | 2019 |

|              |                                    |     |         |     |    |            |      |
|--------------|------------------------------------|-----|---------|-----|----|------------|------|
|              | <i>Cribroheros diquis</i>          | Sec | CoR     | CoR | VU | Unknown    | 2019 |
|              | <i>Cribroheros rhytisma</i>        | Sec | CoR,P   |     | EN | Decreasing | 2019 |
|              | <i>Darienheros calobrensis</i>     | Sec | P       | P   | VU | Unknown    | 2019 |
|              | <i>Isthmoheros tuyrensis</i>       | Sec | P       | P   | VU | Unknown    | 2019 |
|              | <i>Rocio spinosissima</i>          | Sec | G       | G   | EN | Decreasing | 2019 |
| Gobiidae     | <i>Ctenogobius claytonii</i>       | Per | G, N, P |     | VU | Unknown    | 2019 |
|              | <i>Gobiosoma hildebrandi</i>       | Per | P       | P   | VU | Decreasing | 2015 |
|              | <i>Gobiosoma homochroma</i>        | Per | P       | P   | EN | Decreasing | 2015 |
|              | <i>Sicydium adelum</i>             | Per | CoR     |     | EN | Decreasing | 2020 |
|              | <i>Sicydium altum</i>              | Per | CoR     |     | VU | Unknown    | 2020 |
| Loricariidae | <i>Sturisomatichthys dariensis</i> | Pri | P       | P   | EN | Unknown    | 2019 |

Table S2: Global IUCN Red List Status of Central American freshwater fishes by taxonomic family.

| Family         | Total | DD | LC | NT | VU | EN | CR | % Threatened |
|----------------|-------|----|----|----|----|----|----|--------------|
| Anguillidae    | 1     |    |    |    |    | 1  |    | 100          |
| Lacantunidae   | 1     |    |    |    | 1  |    |    | 100          |
| Megalopidae    | 1     |    |    |    | 1  |    |    | 100          |
| Pristidae      | 2     |    |    |    |    |    | 2  | 100          |
| Rivulidae      | 19    | 6  | 3  |    | 1  | 8  | 1  | 52           |
| Profundulidae  | 6     | 1  | 2  |    | 2  | 1  |    | 50           |
| Serranidae     | 2     |    | 1  |    | 1  |    |    | 50           |
| Sphyrnidae     | 2     |    | 1  |    |    |    | 1  | 50           |
| Lebiasinidae   | 3     |    | 2  |    | 1  |    |    | 33           |
| Cichlidae      | 80    | 15 | 37 | 3  | 12 | 7  | 6  | 31           |
| Characidae     | 46    | 6  | 22 | 4  | 9  | 4  | 1  | 30           |
| Gymnotidae     | 4     |    | 3  |    |    |    | 1  | 25           |
| Poeciliidae    | 70    | 15 | 35 | 4  | 10 | 4  | 2  | 23           |
| Atherinopsidae | 14    | 1  | 9  | 1  | 2  |    | 1  | 21           |
| Heptapteridae  | 7     |    | 6  |    |    | 1  |    | 14           |

|                 |    |   |    |   |   |   |    |
|-----------------|----|---|----|---|---|---|----|
| Loricariidae    | 15 |   | 11 | 2 | 1 | 1 | 13 |
| Gobiidae        | 38 | 4 | 29 |   | 3 | 2 | 13 |
| Bryconidae      | 8  |   | 5  | 2 | 1 |   | 13 |
| Lutjanidae      | 10 | 1 | 7  | 1 | 1 |   | 10 |
| Ariidae         | 22 | 4 | 17 |   | 1 |   | 5  |
| Acanthuridae    | 1  |   | 1  |   |   |   | 0  |
| Achiridae       | 11 |   | 11 |   |   |   | 0  |
| Aetobatidae     | 1  |   |    | 1 |   |   | 0  |
| Albulidae       | 2  | 1 |    | 1 |   |   | 0  |
| Anablepidae     | 2  |   | 2  |   |   |   | 0  |
| Apteronotidae   | 1  |   | 1  |   |   |   | 0  |
| Atherinidae     | 1  |   | 1  |   |   |   | 0  |
| Auchenipteridae | 2  |   | 2  |   |   |   | 0  |
| Batrachoididae  | 4  |   | 4  |   |   |   | 0  |
| Belonidae       | 5  |   | 5  |   |   |   | 0  |
| Blenniidae      | 2  | 1 |    | 1 |   |   | 0  |
| Callichthyidae  | 1  |   |    | 1 |   |   | 0  |
| Carangidae      | 16 |   | 16 |   |   |   | 0  |
| Carcharhinidae  | 3  |   | 1  | 2 |   |   | 0  |
| Catostomidae    | 1  | 1 |    |   |   |   | 0  |
| Centropomidae   | 11 |   | 11 |   |   |   | 0  |
| Chaetodontidae  | 1  |   | 1  |   |   |   | 0  |
| Chanidae        | 1  |   | 1  |   |   |   | 0  |
| Clupeidae       | 13 |   | 12 | 1 |   |   | 0  |
| Crenuchidae     | 1  |   | 1  |   |   |   | 0  |
| Ctenoluciidae   | 1  |   | 1  |   |   |   | 0  |
| Curimatidae     | 1  |   | 1  |   |   |   | 0  |
| Cynoglossidae   | 3  |   | 3  |   |   |   | 0  |
| Cyprinodontidae | 3  |   | 3  |   |   |   | 0  |
| Dactyloscopidae | 2  |   | 2  |   |   |   | 0  |
| Eleotridae      | 19 | 6 | 13 |   |   |   | 0  |

|                  |    |   |    |  |  |   |
|------------------|----|---|----|--|--|---|
| Elopidae         | 2  | 1 | 1  |  |  | 0 |
| Engraulidae      | 21 | 2 | 19 |  |  | 0 |
| Erythrinidae     | 2  |   | 2  |  |  | 0 |
| Gasteropelecidae | 1  |   | 1  |  |  | 0 |
| Gerreidae        | 21 |   | 21 |  |  | 0 |
| Gobiesocidae     | 5  | 2 | 3  |  |  | 0 |
| Haemulidae       | 9  | 3 | 6  |  |  | 0 |
| Hemiramphidae    | 6  | 1 | 5  |  |  | 0 |
| Hypopomidae      | 1  |   | 1  |  |  | 0 |
| Kyphosidae       | 1  |   | 1  |  |  | 0 |
| Labridae         | 2  | 1 | 1  |  |  | 0 |
| Labrisomidae     | 1  |   | 1  |  |  | 0 |
| Lepisosteidae    | 1  |   | 1  |  |  | 0 |
| Lobotidae        | 1  |   | 1  |  |  | 0 |
| Microdesmidae    | 2  | 1 | 1  |  |  | 0 |
| Mugilidae        | 9  | 1 | 8  |  |  | 0 |
| Ophichthidae     | 2  |   | 2  |  |  | 0 |
| Paralichthyidae  | 8  |   | 8  |  |  | 0 |
| Parodontidae     | 1  |   | 1  |  |  | 0 |
| Pimelodidae      | 1  |   | 1  |  |  | 0 |
| Polynemidae      | 3  |   | 3  |  |  | 0 |
| Pomacentridae    | 1  | 1 |    |  |  | 0 |
| Pristigasteridae | 2  |   | 2  |  |  | 0 |
| Sciaenidae       | 18 | 2 | 16 |  |  | 0 |
| Scombridae       | 1  |   | 1  |  |  | 0 |
| Sparidae         | 1  |   | 1  |  |  | 0 |
| Sphyraenidae     | 2  |   | 2  |  |  | 0 |
| Spratelloididae  | 1  |   | 1  |  |  | 0 |
| Synbranchidae    | 2  |   | 2  |  |  | 0 |
| Syngnathidae     | 7  | 1 | 6  |  |  | 0 |
| Synodontinae     | 1  |   | 1  |  |  | 0 |

|                  |     |    |     |    |    |    |    |
|------------------|-----|----|-----|----|----|----|----|
| Tetraodontidae   | 5   |    | 5   |    |    |    | 0  |
| Trichomycteridae | 1   |    | 1   |    |    |    | 0  |
| Grand Total      | 602 | 78 | 409 | 24 | 47 | 29 | 15 |

Table S3. List of non-native species by country. Countries of distribution and endemism are shown as Guatemala (G), Belize (B), El Salvador (EL), Honduras (H), Costa Rica (CoR), Nicaragua (N), and Panama (P). \* Denotes translocations

|    | Species                              | B | G | EL | H | N | CoR | P | Source              |
|----|--------------------------------------|---|---|----|---|---|-----|---|---------------------|
| 1  | <i>Cichla ocellaris</i>              | X |   |    |   |   |     | X | [134]               |
| 2  | <i>Cichla monoculus</i>              |   |   |    |   |   |     | X | [138]               |
| 3  | <i>Oreochromis aureus</i>            |   | X | X  |   | X | X   | X | [69, 140, 145]      |
| 4  | <i>Oreochromis niloticus</i>         |   | X | X  | X |   |     |   | [69, 121, 146 147]  |
| 5  | <i>Oreochromis mossambicus</i>       |   | X | X  | X | X | X   | X | [69, 140, 146]      |
| 6  | <i>Oreochromis urolepis</i>          |   | X |    |   |   |     |   | [69]                |
| 7  | <i>Oreochromis sp.</i>               |   | X |    |   |   |     |   | [122]               |
| 8  | <i>Parachromis dovii</i> *           |   | X | X  |   |   |     |   | [69, 142]           |
| 9  | <i>Parachromis managuensis</i> *     |   | X | X  |   |   |     | X | [69, 122, 142]      |
| 10 | <i>Pterygoplichthys sp.*</i>         |   | X |    |   |   | X   |   | [69, 140]           |
| 11 | <i>Pterygoplichthys disjunctivus</i> |   | X |    |   |   |     |   | [69, 122]           |
| 12 | <i>Pterygoplichthys pardalis</i>     |   | X |    |   |   | X   |   | [69, 122, 145]      |
| 13 | <i>Hypostomus sp.</i>                |   | X |    |   | X | X   |   | [69, 137, 145]      |
| 14 | <i>Hypostomus plecostomus</i>        |   |   |    |   | X |     |   | [136]               |
| 15 | <i>Cyprinus carpio</i>               |   | X | X  | X | X | X   |   | [69, 122, 140, 145] |
| 16 | <i>Ctenopharyngodon idella</i>       |   | X |    | X |   | X   | X | [69, 122, 140, 146] |
| 17 | <i>Hypophthalmichthys molitrix</i>   |   |   |    | X |   | X   | X | [140, 146]          |
| 18 | <i>Hypophthalmichthys nobilis</i>    |   |   |    |   |   | X   | X | [140]               |
| 19 | <i>Carassius auratus</i>             |   | X |    |   |   | X   |   | [69, 140, 145]      |
| 20 | <i>Salmo trutta</i>                  |   | X |    |   |   |     | X | [69]                |
| 21 | <i>Oncorhynchus mykiss</i>           |   | X |    | X |   | X   |   | [69, 140, 145]      |
| 22 | <i>Poecilia reticulata</i>           |   | X |    |   |   | X   |   | [69, 140]           |
| 23 | <i>Colossoma macropomum</i>          |   | X |    |   |   | X   |   | [69, 140]           |

|    |                                    |  |   |   |   |   |   |   |                |
|----|------------------------------------|--|---|---|---|---|---|---|----------------|
| 24 | <i>Piaractus brachypomus</i>       |  | X |   |   |   |   |   | [69, 140]      |
| 25 | <i>Ictalurus punctatus</i>         |  | X |   | X |   |   |   | [69, 116, 146] |
| 26 | <i>Pangasianodon hypophthalmus</i> |  |   |   |   |   | X |   | [145]          |
| 27 | <i>Gobiomorus dormitor</i> *       |  |   |   |   | X |   |   | [160]          |
| 28 | <i>Micropterus salmoides</i>       |  | X | X | X |   | X | X | [145, 146]     |
| 29 | <i>Lepomis gibbosus</i>            |  | X |   |   |   |   |   | [69]           |
| 30 | <i>Lepomis macrochirus</i>         |  | X |   |   |   |   |   | [69]           |
| 31 | <i>Pomoxis nigromaculatus</i>      |  | X |   |   |   |   |   | [69]           |
